# Supplementary material for: Validating Healthy Eating Index, Glycemic Index, and Glycemic Load with Modern Diets for E-Health Era
Source: MDPI journal article supplement (doi:10.3390/nu15051263), 2023-03-03
Supplement: s1 [file s1]

**Supplementary Table S1.** Healthy eating parameters for all diets per day (N=131).

| Diets (n)         | M ± SD | Healthy Eating Index | Glycemic Index | Glycemic Load | n meals (GL <20) | Carbohydrates g | Carbohydrates / meals (GL <20), g | Calories kcal | Protein g     | Total Fat g   |
|-------------------|--------|----------------------|----------------|---------------|------------------|-----------------|-----------------------------------|---------------|---------------|---------------|
| Liquid (8)        |        | 48.78 ± 6.37         | 56.38 ± 4.96   | 74.30 ± 39.47 | 3.71 ± 1.97      | 135.6 ± 81.01   | 35.73 ± 3.30                      | 697.3 ± 324.3 | 24.19 ± 9.89  | 10.61 ± 5.15  |
| Convenient (30)   |        | 57.86 ± 4.90         | 59.86 ± 3.06   | 89.20 ± 24.87 | 4.46 ± 1.24      | 148.7 ± 40.40   | 33.50 ± 1.71                      | 1,319 ± 375.1 | 40.77 ± 17.67 | 64.57 ± 25.15 |
| Canned Food (10)  |        | 54.60 ± 1.99         | 56.98 ± 1.82   | 63.06 ± 5.78  | 3.15 ± 0.29      | 110.6 ± 9.16    | 35.13 ± 1.09                      | 891.9 ± 52.95 | 29.00 ± 4.11  | 38.21 ± 8.34  |
| High-school (10)  |        | 59.02 ± 4.56         | 60.32 ± 2.14   | 115.0 ± 17.50 | 5.75 ± 0.88      | 191.2 ± 31.89   | 33.20 ± 1.18                      | 1,644 ± 299.1 | 61.88 ± 15.03 | 72.86 ± 15.03 |
| Fast-food (10)    |        | 59.98 ± 5.86         | 62.27 ± 2.53   | 89.53 ± 12.42 | 4.48 ± 0.62      | 144.2 ± 22.89   | 32.17 ± 1.36                      | 1,421 ± 172.2 | 31.42 ± 4.12  | 82.63 ± 23.09 |
| Ethnic (71)       |        | 65.28 ± 5.17         | 58.88 ± 4.82   | 68.69 ± 31.71 | 3.43 ± 1.59      | 117.4 ± 55.73   | 34.23 ± 3.31                      | 955.2 ± 388.1 | 44.17 ± 16.51 | 34.90 ± 14.74 |
| Western (38)      |        | 64.82 ± 3.22         | 57.29 ± 4.15   | 63.47 ± 11.28 | 3.17 ± 0.56      | 111.7 ± 23.77   | 35.13 ± 3.22                      | 950.4 ± 225.1 | 43.14 ± 8.07  | 37.13 ± 12.71 |
| American (9)      |        | 67.24 ± 2.94         | 59.12 ± 1.88   | 67.71 ± 11.82 | 3.39 ± 0.59      | 114.4 ± 18.72   | 33.86 ± 1.10                      | 873.6 ± 92.82 | 38.33 ± 5.01  | 29.65 ± 1.95  |
| Mexican (10)      |        | 61.75 ± 2.89         | 52.92 ± 5.90   | 66.64 ± 6.04  | 3.33 ± 0.30      | 128.3 ± 25.53   | 38.30 ± 5.02                      | 1,161 ± 267.9 | 48.80 ± 4.66  | 50.65 ± 16.59 |
| Italian (10)      |        | 64.54 ± 0.87         | 58.79 ± 0.90   | 68.44 ± 5.91  | 3.42 ± 0.30      | 116.4 ± 10.07   | 34.03 ± 0.53                      | 1,030 ± 49.80 | 50.01 ± 2.12  | 39.73 ± 1.73  |
| Mediterranean (9) |        | 66.11 ± 2.94         | 58.66 ± 1.86   | 50.18 ± 10.31 | 2.51 ± 0.52      | 85.29 ± 15.87   | 34.12 ± 1.05                      | 704.2 ± 62.07 | 34.05 ± 5.35  | 26.70 ± 2.79  |
| Eastern (33)      |        | 65.80 ± 6.78         | 60.70 ± 4.95   | 74.71 ± 44.53 | 3.74 ± 2.23      | 124.0 ± 77.82   | 33.20 ± 3.14                      | 960.8 ± 520.4 | 45.36 ± 22.76 | 32.34 ± 16.60 |
| Japanese (10)     |        | 58.97 ± 0.57         | 62.46 ± 0.42   | 56.14 ± 7.29  | 2.81 ± 0.36      | 89.92 ± 12.00   | 32.02 ± 0.22                      | 769.4 ± 45.07 | 40.54 ± 7.28  | 27.57 ± 1.61  |
| Chinese (10)      |        | 65.75 ± 2.66         | 63.25 ± 1.56   | 78.58 ± 9.73  | 3.93 ± 0.49      | 124.1 ± 14.00   | 31.64 ± 0.81                      | 1,048 ± 48.15 | 50.10 ± 3.39  | 40.58 ± 2.32  |
| Korean (13)       |        | 71.11 ± 6.89         | 57.38 ± 6.59   | 86.02 ± 68.83 | 4.30 ± 3.44      | 150.1 ± 119.1   | 35.30 ± 4.22                      | 1,041 ± 821.7 | 45.42 ± 35.99 | 29.67 ± 25.41 |
| Smoothie (22)     |        | 78.61 ± 7.43         | 54.52 ± 3.72   | 240.8 ± 75.77 | 12.04 ± 3.79     | 444.2 ± 140.3   | 36.83 ± 2.23                      | 2,802 ± 1,137 | 103.9 ± 44.38 | 80.59 ± 52.41 |

Note. M: mean; SD: standard deviation; g: gram; kcal: calories.

**Supplementary Table S2.** Progression on selecting significant factors contributing to Health Eating Index (HEI).

| Parameters, median units                    | Logistic Regression with Validation |      |       |      | Generalized Regression<br>Elastic Net Validation |      |       |      |
|---------------------------------------------|-------------------------------------|------|-------|------|--------------------------------------------------|------|-------|------|
|                                             | $p (\chi^2)$                        | MR   | AICc  | AUC  | $p (\chi^2)$                                     | MR   | AICc  | AUC  |
| <b>HEI <math>\geq 80</math></b>             |                                     |      |       |      |                                                  |      |       |      |
| <b>12 HEI Factors</b>                       |                                     |      |       |      |                                                  |      |       |      |
| (Intercept)                                 | 0.9859                              | 0.00 | 48.75 | 1.00 | 0.3137                                           | 0.00 | 42.36 | 1.00 |
| Whole Fruits, $\geq 0.33$ cup               | 0.9515                              |      |       |      | <0.0001                                          |      |       |      |
| Dark Greens, $\geq 0.27$ cup                | 0.9518                              |      |       |      | <0.0001                                          |      |       |      |
| Total Grains, $\geq 2.23$ oz                | 0.9993                              |      |       |      | 0.0352                                           |      |       |      |
| Whole Grains, $\geq 0.41$ oz                | 0.9828                              |      |       |      | <0.0001                                          |      |       |      |
| Dairy $\geq 0.56$ , cup                     | 0.8814                              |      |       |      | <0.0001                                          |      |       |      |
| Proteins, $\geq 3.60$ oz                    | 0.9793                              |      |       |      | 0.0024                                           |      |       |      |
| Empty Calories, $\leq 88.87$ calorie        | 0.9337                              |      |       |      | <0.0001                                          |      |       |      |
| Total Fruits, $\geq 0.43$ cup               | 0.9935                              |      |       |      | 0.2875                                           |      |       |      |
| Vegetables, $\geq 1$ cup                    | 0.9890                              |      |       |      | 1.0000                                           |      |       |      |
| Oils and nuts, $\geq 3.51$ g                | 0.9885                              |      |       |      | 0.2976                                           |      |       |      |
| Sodium, $\leq 2.17$ g                       | 0.9666                              |      |       |      | 0.6188                                           |      |       |      |
| Saturated Fats, $\leq 10.32$ % calorie      | 0.9962                              |      |       |      | 0.8361                                           |      |       |      |
| <b>7 HEI Factors</b>                        |                                     |      |       |      |                                                  |      |       |      |
| (Intercept)                                 | 0.9922                              | 0.00 | 22.88 | 1.00 | <0.0001                                          | 0.00 | 22.87 | 1.00 |
| Whole Fruits, $\geq 0.33$ cup               | 0.9598                              |      |       |      | <0.0001                                          |      |       |      |
| Dark Greens, $\geq 0.27$ cup                | 0.9361                              |      |       |      | <0.0001                                          |      |       |      |
| Total Grains, $\geq 2.23$ oz                | 0.9875                              |      |       |      | <0.0001                                          |      |       |      |
| Whole Grains, $\geq 0.41$ oz                | 0.9112                              |      |       |      | <0.0001                                          |      |       |      |
| Dairy, $\geq 0.56$ cup                      | 0.8898                              |      |       |      | <0.0001                                          |      |       |      |
| Proteins, $\geq 3.60$ oz                    | 0.9951                              |      |       |      | 0.0026                                           |      |       |      |
| Empty Calories, $\leq 88.87$ calorie        | 0.9679                              |      |       |      | <0.0001                                          |      |       |      |
| <b>3 HEI Factors (Final model, Table 3)</b> |                                     |      |       |      |                                                  |      |       |      |
| (Intercept)                                 | 0.9296                              | 0.00 | 9.77  | 1.00 | <0.0001                                          | 0.00 | 9.78  | 1.00 |
| Whole Fruits, $\geq 0.33$ cup               | 0.9206                              |      |       |      | <0.0001                                          |      |       |      |
| Whole Grains, $\geq 0.41$ oz                | 0.9208                              |      |       |      | <0.0001                                          |      |       |      |
| Empty Calories, $\leq 88.87$ calorie        | 0.9161                              |      |       |      | <0.0001                                          |      |       |      |
| <b>3 Caloric Factors</b>                    |                                     |      |       |      |                                                  |      |       |      |
| (Intercept)                                 | 0.1491                              | 0.03 | 18.00 | 0.88 | 0.1489                                           | 0.03 | 18.00 | 0.88 |
| Carbohydrates, $\geq 123.4$ g               | 0.9314                              |      |       |      | <0.0001                                          |      |       |      |
| Protein, $\geq 43.8$ g                      | 0.9272                              |      |       |      | <0.0001                                          |      |       |      |
| Fat, $\geq 39$ g                            | 0.9275                              |      |       |      | <0.0001                                          |      |       |      |
| <b>2 Diet Factors</b>                       |                                     |      |       |      |                                                  |      |       |      |
| (Intercept)                                 | 0.8852                              | 0.10 | 13.60 | 0.95 | <0.0001                                          | 0.10 | 13.60 | 0.95 |
| Korean Diets                                | 0.8875                              |      |       |      | <0.0001                                          |      |       |      |
| Smoothie Diets                              | 0.8624                              |      |       |      | <0.0001                                          |      |       |      |
| <b>3 HEI, 1 Caloric, and 1 Diet Factors</b> |                                     |      |       |      |                                                  |      |       |      |
| (Intercept)                                 | 0.9797                              | 0.00 | 15.84 | 1.00 | 0.0011                                           | 0.00 | 15.85 | 1.00 |
| Whole Fruits, $\geq 0.33$ cup               | 0.9237                              |      |       |      | <0.0001                                          |      |       |      |
| Whole Grains, $\geq 0.41$ oz                | 0.9304                              |      |       |      | <0.0001                                          |      |       |      |
| Empty Calories, $\leq 88.87$ calorie        | 0.9564                              |      |       |      | <0.0001                                          |      |       |      |
| Fat, $\geq 39$ g                            | 0.9930                              |      |       |      | 0.0056                                           |      |       |      |
| Korean Diets                                | 0.9147                              |      |       |      | 0.0012                                           |      |       |      |

Continue Table S2

| Parameters, median units                      | Logistic Regression with Validation |      |       |      | Generalized Regression<br>Elastic Net Validation |      |       |      |
|-----------------------------------------------|-------------------------------------|------|-------|------|--------------------------------------------------|------|-------|------|
|                                               | $p (\chi^2)$                        | MR   | AICc  | AUC  | $p (\chi^2)$                                     | MR   | AICc  | AUC  |
| <b>HEI <math>\geq 64.4</math> (median)</b>    |                                     |      |       |      |                                                  |      |       |      |
| <b>12 HEI Factors</b>                         |                                     |      |       |      |                                                  |      |       |      |
| (Intercept)                                   | 0.0177                              | 0.17 | 94.02 | 0.91 | <0.0001                                          | 0.23 | 67.81 | 0.88 |
| Total Fruits, $\geq 0.43$ cup                 | 0.0485                              |      |       |      | 0.0002                                           |      |       |      |
| Dark Greens, $\geq 0.27$ cup                  | 0.0221                              |      |       |      | 0.0001                                           |      |       |      |
| Total Grains, $\geq 2.23$ oz                  | 0.0194                              |      |       |      | <0.0001                                          |      |       |      |
| Whole Grains, $\geq 0.41$ oz                  | 0.0579                              |      |       |      | 0.0488                                           |      |       |      |
| Dairy, $\geq 0.56$ cup                        | 0.0684                              |      |       |      | 0.0221                                           |      |       |      |
| Saturated Fats, $\leq 10.32$ % calorie        | 0.1116                              |      |       |      | 0.0298                                           |      |       |      |
| Whole Fruits, $\geq 0.33$ cup                 | 0.0485                              |      |       |      | 0.1329                                           |      |       |      |
| Vegetables, $\geq 1$ cup                      | 0.1098                              |      |       |      | 0.7210                                           |      |       |      |
| Proteins, $\geq 3.60$ oz                      | 0.0677                              |      |       |      | 0.1871                                           |      |       |      |
| Oils and nuts, $\geq 3.51$ g                  | 0.9902                              |      |       |      | 1.0000                                           |      |       |      |
| Sodium, $\leq 2.17$ g                         | 0.9076                              |      |       |      | 0.8301                                           |      |       |      |
| Empty Calories, $\leq 88.87$ calorie          | 0.9403                              |      |       |      | 0.7843                                           |      |       |      |
| <b>3 HEI Factors</b>                          |                                     |      |       |      |                                                  |      |       |      |
| (Intercept)                                   | <0.0001                             | 0.13 | 34.16 | 0.92 | <0.0001                                          | 0.13 | 34.16 | 0.92 |
| Total Fruits, $\geq 0.43$ cup                 | 0.0361                              |      |       |      | 0.0243                                           |      |       |      |
| Dark Greens, $\geq 0.27$ cup                  | <0.0001                             |      |       |      | <0.0001                                          |      |       |      |
| Whole Grains, $\geq 0.41$ oz                  | 0.0031                              |      |       |      | 0.0018                                           |      |       |      |
| <b>3 Diet Factors</b>                         |                                     |      |       |      |                                                  |      |       |      |
| (Intercept)                                   | 0.8964                              | 0.40 | 40.62 | 0.73 | <0.0001                                          | 0.40 | 40.62 | 0.73 |
| Canned Food Diets                             | 0.9163                              |      |       |      | <0.0001                                          |      |       |      |
| Japanese Diets                                | 0.9163                              |      |       |      | <0.0001                                          |      |       |      |
| Smoothie Diets                                | 0.0068                              |      |       |      | 0.0068                                           |      |       |      |
| <b>2 HEI and 1 Diet Factors (Final model)</b> |                                     |      |       |      |                                                  |      |       |      |
| (Intercept)                                   | 0.9094                              | 0.20 | 29.86 | 0.94 | <0.0001                                          | 0.20 | 29.87 | 0.94 |
| Total Fruits, $\geq 0.43$ cup                 | 0.0006                              |      |       |      | 0.0008                                           |      |       |      |
| Dark Greens, $\geq 0.27$ cup                  | <0.0001                             |      |       |      | <0.0001                                          |      |       |      |
| Canned Food Diets                             | 0.8845                              |      |       |      | <0.0001                                          |      |       |      |

Note. MR: Misclassification rate; AICc: Akaike's information criterion with corrections; AUC: Area under the curve; HEI: Healthy Eating Index; Protein: oz from HEI, g from caloric factors. (none of caloric factors were significant for HEI median  $\geq 64.4$  prediction)

**Supplementary Table S3.** Progression on selecting significant factors contributing to glycemic index (GI).

| Parameters, median units                                  | Logistic Regression with Validation |      |       |      | Generalized Regression<br>Elastic Net Validation |      |       |      |
|-----------------------------------------------------------|-------------------------------------|------|-------|------|--------------------------------------------------|------|-------|------|
|                                                           | $p (\chi^2)$                        | MR   | AICc  | AUC  | $p (\chi^2)$                                     | MR   | AICc  | AUC  |
| <b>GI ≤55</b>                                             |                                     |      |       |      |                                                  |      |       |      |
| <b>2 HEI Factors</b>                                      |                                     |      |       |      |                                                  |      |       |      |
| (Intercept)                                               | 0.8377                              | 0.27 | 37.74 | 0.73 | 0.2629                                           | 0.23 | 35.50 | 0.73 |
| Total Fruits, ≥0.43 cup                                   | 0.0012                              |      |       |      | 0.0024                                           |      |       |      |
| Vegetables, ≥1 cup                                        | 0.0044                              |      |       |      | 0.0013                                           |      |       |      |
| <b>1 Caloric Factor</b>                                   |                                     |      |       |      |                                                  |      |       |      |
| (Intercept)                                               | 0.0146                              | 0.23 | 36.36 | 0.64 | 0.0037                                           | 0.23 | 35.60 | 0.64 |
| Carbohydrates, ≥123.4 g                                   | 0.0025                              |      |       |      | 0.0171                                           |      |       |      |
| <b>5 Diet Factors</b>                                     |                                     |      |       |      |                                                  |      |       |      |
| (Intercept)                                               | 0.8615                              | 0.23 | 36.25 | 0.86 | <0.0001                                          | 0.23 | 36.26 | 0.86 |
| Liquids Diets                                             | 0.8614                              |      |       |      | <0.0001                                          |      |       |      |
| Canned Food Diets                                         | 0.8738                              |      |       |      | <0.0001                                          |      |       |      |
| Mexican Diets                                             | 0.8587                              |      |       |      | <0.0001                                          |      |       |      |
| Smoothie Diets                                            | 0.8420                              |      |       |      | <0.0001                                          |      |       |      |
| Korean Diets                                              | 0.8605                              |      |       |      | <0.0001                                          |      |       |      |
| <b>1 HEI, 1 Caloric, and 1 Diet Factors (Final Model)</b> |                                     |      |       |      |                                                  |      |       |      |
| (Intercept)                                               | 0.8713                              | 0.23 | 33.63 | 0.84 | <0.0001                                          | 0.23 | 33.63 | 0.84 |
| Total Fruits, ≥0.43 cup                                   | 0.8729                              |      |       |      | <0.0001                                          |      |       |      |
| Carbohydrates, ≥123.4 g                                   | 0.0037                              |      |       |      | 0.0032                                           |      |       |      |
| Mexican Diets                                             | 0.8719                              |      |       |      | <0.0001                                          |      |       |      |
| <b>GI ≤59 (median)</b>                                    |                                     |      |       |      |                                                  |      |       |      |
| <b>2 HEI Factors</b>                                      |                                     |      |       |      |                                                  |      |       |      |
| (Intercept)                                               | 0.0003                              | 0.37 | 39.72 | 0.77 | 0.0006                                           | 0.37 | 39.72 | 0.77 |
| Total Fruits, ≥0.43 cup                                   | 0.0026                              |      |       |      | 0.0026                                           |      |       |      |
| Whole Grains, ≥0.41 oz                                    | 0.0004                              |      |       |      | 0.0005                                           |      |       |      |
| <b>5 Diet Factors</b>                                     |                                     |      |       |      |                                                  |      |       |      |
| (Intercept)                                               | 0.9780                              | 0.23 | 37.95 | 0.87 | 0.2130                                           | 0.23 | 37.95 | 0.87 |
| Canned Food Diets                                         | 0.0251                              |      |       |      | 0.0251                                           |      |       |      |
| Mexican Diets                                             | 0.8947                              |      |       |      | <0.0001                                          |      |       |      |
| Chinese Diets                                             | 0.8971                              |      |       |      | <0.0001                                          |      |       |      |
| Japanese Diets                                            | 0.8900                              |      |       |      | <0.0001                                          |      |       |      |
| Smoothie Diets                                            | 0.0016                              |      |       |      | 0.0016                                           |      |       |      |
| <b>1 HEI and 2 Diet Factors (Final Model)</b>             |                                     |      |       |      |                                                  |      |       |      |
| (Intercept)                                               | 0.9805                              | 0.13 | 33.66 | 0.89 | 0.0336                                           | 0.13 | 33.66 | 0.89 |
| Total Fruits, ≥0.43 cup                                   | 0.0016                              |      |       |      | 0.0016                                           |      |       |      |
| Mexican Diets                                             | 0.8558                              |      |       |      | <0.0001                                          |      |       |      |
| Chinese Diets                                             | 0.8614                              |      |       |      | <0.0001                                          |      |       |      |

Note. MR: Misclassification rate; AICc: Akaike's information criterion with corrections; AUC: Area under the curve; GI: Glycemic Index; HEI: Healthy Eating Index.

**Supplementary Table S4.** Progression on selecting significant factors contributing to glycemic load (GL).

| Parameters, median units              | Logistic Regression with Validation |      |       |      | Generalized Regression<br>Elastic Net Validation |      |       |      |
|---------------------------------------|-------------------------------------|------|-------|------|--------------------------------------------------|------|-------|------|
|                                       | $p (\chi^2)$                        | MR   | AICc  | AUC  | $p (\chi^2)$                                     | MR   | AICc  | AUC  |
| <b>GL ≤71.8 (median)</b>              |                                     |      |       |      |                                                  |      |       |      |
| <b>3 HEI Factors</b>                  |                                     |      |       |      |                                                  |      |       |      |
| (Intercept)                           | 0.0918                              | 0.33 | 43.57 | 0.78 | 0.1463                                           | 0.33 | 42.93 | 0.78 |
| Vegetables, ≥1 cup                    | 0.0064                              |      |       |      | 0.0169                                           |      |       |      |
| Sodium, ≤2.17 g                       | 0.0197                              |      |       |      | 0.0324                                           |      |       |      |
| Empty Calories, ≤88.87 calorie        | 0.0003                              |      |       |      | 0.0007                                           |      |       |      |
| <b>1 Caloric Factor (Final Model)</b> |                                     |      |       |      |                                                  |      |       |      |
| (Intercept)                           | <0.0001                             | 0.13 | 29.33 | 0.87 | <0.0001                                          | 0.13 | 28.53 | 0.87 |
| Carbohydrates, ≥123.4 g               | <0.0001                             |      |       |      | <0.0001                                          |      |       |      |
| <b>3 Diet Factors</b>                 |                                     |      |       |      |                                                  |      |       |      |
| (Intercept)                           | 0.8743                              | 0.13 | 31.23 | 0.85 | <0.0001                                          | 0.13 | 31.24 | 0.85 |
| High school Diets                     | 0.9353                              |      |       |      | <0.0001                                          |      |       |      |
| Fast food Diets                       | 0.9309                              |      |       |      | <0.0001                                          |      |       |      |
| Smoothie Diets                        | 0.8965                              |      |       |      | <0.0001                                          |      |       |      |
| <b>1 Caloric and 3 Diet Factors</b>   |                                     |      |       |      |                                                  |      |       |      |
| (Intercept)                           | 0.8840                              | 0.13 | 30.85 | 0.93 | <0.0001                                          | 0.13 | 30.85 | 0.93 |
| Carbohydrates, ≥123.4 g               | <0.0001                             |      |       |      | <0.0001                                          |      |       |      |
| High School Diets                     | 0.9440                              |      |       |      | <0.0001                                          |      |       |      |
| Fast food Diets                       | 0.9401                              |      |       |      | <0.0001                                          |      |       |      |
| Smoothie Diets                        | 0.9103                              |      |       |      | <0.0001                                          |      |       |      |

*Note.* MR: Misclassification rate; AICc: Akaike's information criterion with corrections; AUC: Area under the curve; GL: Glycemic Load; HEI: Healthy Eating Index.

**Supplementary Table S5.** Progression on selecting significant factors contributing to carbohydrates.

| Parameters, median units                               | Logistic Regression with Validation |      |       |      | Generalized Regression Elastic Net Validation |      |       |      |
|--------------------------------------------------------|-------------------------------------|------|-------|------|-----------------------------------------------|------|-------|------|
|                                                        | $p (\chi^2)$                        | MR   | AICc  | AUC  | $p (\chi^2)$                                  | MR   | AICc  | AUC  |
| <b>Carbohydrate <math>\leq 123.4</math> g (median)</b> |                                     |      |       |      |                                               |      |       |      |
| <b>4 HEI Factors</b>                                   |                                     |      |       |      |                                               |      |       |      |
| (Intercept)                                            | 0.6177                              | 0.20 | 36.87 | 0.87 | 0.6416                                        | 0.20 | 36.87 | 0.87 |
| Vegetables, $\geq 1$ cup                               | 0.0028                              |      |       |      | 0.0004                                        |      |       |      |
| Whole Grains, $\geq 0.41$ oz                           | 0.0048                              |      |       |      | 0.0156                                        |      |       |      |
| Sodium, $\leq 2.17$ g                                  | 0.0005                              |      |       |      | 0.0019                                        |      |       |      |
| Empty Calories, $\leq 88.87$ calorie                   | 0.0004                              |      |       |      | <0.0001                                       |      |       |      |
| <b>3 HEI Factors (Final Model)</b>                     |                                     |      |       |      |                                               |      |       |      |
| (Intercept)                                            | 0.0109                              | 0.17 | 34.16 | 0.90 | 0.0168                                        | 0.17 | 34.16 | 0.90 |
| Whole Grains, $\geq 0.41$ oz                           | 0.0042                              |      |       |      | 0.0058                                        |      |       |      |
| Sodium, $\leq 2.17$ g                                  | <0.0001                             |      |       |      | <0.0001                                       |      |       |      |
| Empty Calories, $\leq 88.87$ calorie                   | 0.0013                              |      |       |      | 0.0011                                        |      |       |      |
| <b>2 Diet Factors</b>                                  |                                     |      |       |      |                                               |      |       |      |
| (Intercept)                                            | 0.8901                              | 0.27 | 36.68 | 0.73 | <0.0001                                       | 0.27 | 36.68 | 0.73 |
| High-school Diets                                      | 0.9332                              |      |       |      | <0.0001                                       |      |       |      |
| Smoothie Diets                                         | 0.8931                              |      |       |      | <0.0001                                       |      |       |      |
| <b>3 HEI and 1 Diet Factors</b>                        |                                     |      |       |      |                                               |      |       |      |
| (Intercept)                                            | 0.8918                              | 0.17 | 35.29 | 0.91 | <0.0001                                       | 0.17 | 35.30 | 0.91 |
| Whole Grains, $\geq 0.41$ oz                           | 0.0108                              |      |       |      | 0.0164                                        |      |       |      |
| Sodium, $\leq 2.17$ g                                  | 0.0002                              |      |       |      | 0.0003                                        |      |       |      |
| Empty Calories, $\leq 88.87$ calorie                   | 0.0007                              |      |       |      | 0.0012                                        |      |       |      |
| Smoothie Diets                                         | 0.8745                              |      |       |      | <0.0001                                       |      |       |      |

Note. MR: Misclassification rate; AICc: Akaike's information criterion with corrections; AUC: Area under the curve; HEI: Healthy Eating Index.

**Supplementary Table S6.** Progression on selecting significant factors contributing to standardized carbohydrates per median number of meals ( $\leq 33.95$  g) needed for glycemic load (GL) < 20.

| Parameters, median units                                                                     | Logistic Regression with Validation |      |       |      | Generalized Regression Elastic Net Validation |      |       |      |
|----------------------------------------------------------------------------------------------|-------------------------------------|------|-------|------|-----------------------------------------------|------|-------|------|
|                                                                                              | $p$ ( $\chi^2$ )                    | MR   | AICc  | AUC  | $p$ ( $\chi^2$ )                              | MR   | AICc  | AUC  |
| <b>Carbohydrate / number of meals needed for GL &lt;20, <math>\leq 33.95</math> (median)</b> |                                     |      |       |      |                                               |      |       |      |
| <b>2 HEI Factors</b>                                                                         |                                     |      |       |      |                                               |      |       |      |
| (Intercept)                                                                                  | 0.0005                              | 0.33 | 39.91 | 0.78 | 0.0007                                        | 0.33 | 39.92 | 0.78 |
| Total Fruits, $\geq 0.43$ cup                                                                | 0.0045                              |      |       |      | 0.0045                                        |      |       |      |
| Whole Grains, $\geq 0.41$ oz                                                                 | 0.0002                              |      |       |      | 0.0003                                        |      |       |      |
| <b>3 Diet Factors (Final Model)</b>                                                          |                                     |      |       |      |                                               |      |       |      |
| (Intercept)                                                                                  | 0.8374                              | 0.20 | 35.09 | 0.81 | <0.0001                                       | 0.20 | 35.09 | 0.81 |
| Canned Food Diets                                                                            | 0.0082                              |      |       |      | 0.0082                                        |      |       |      |
| Mexican Diets                                                                                | 0.8907                              |      |       |      | <0.0001                                       |      |       |      |
| Smoothie Diets                                                                               | 0.0004                              |      |       |      | 0.0004                                        |      |       |      |
| <b>2 HEI and 1 Diet Factors</b>                                                              |                                     |      |       |      |                                               |      |       |      |
| (Intercept)                                                                                  | 0.8849                              | 0.30 | 36.33 | 0.88 | <0.0001                                       | 0.30 | 36.33 | 0.88 |
| Total Fruits, $\geq 0.43$ cup                                                                | 0.0009                              |      |       |      | 0.0009                                        |      |       |      |
| Whole Grains, $\geq 0.41$ oz                                                                 | 0.0039                              |      |       |      | 0.0037                                        |      |       |      |
| Mexican Diets                                                                                | 0.8977                              |      |       |      | <0.0001                                       |      |       |      |

*Note.* MR: Misclassification rate; AICc: Akaike's information criterion with corrections; AUC: Area under the curve; HEI: Healthy Eating Index.

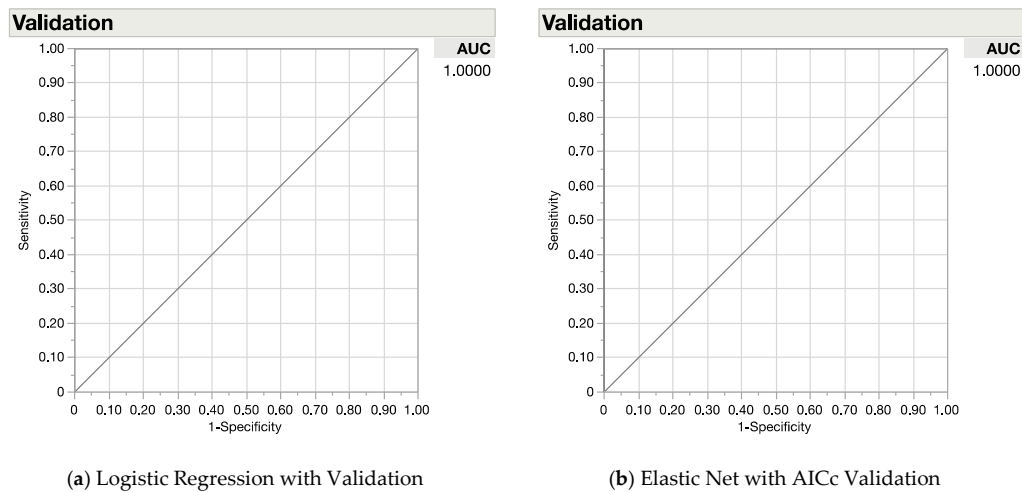

**Figure S1.** Predictors of Healthy Eating Index (80), including 3 HEI factors (whole fruit, whole grains, and empty calories): Area under the receiver operating characteristic curve (AUC) for baseline (a) logistic regression model; (b) Elastic Net with Akaike's information criteria with correction (AICc) validation model.

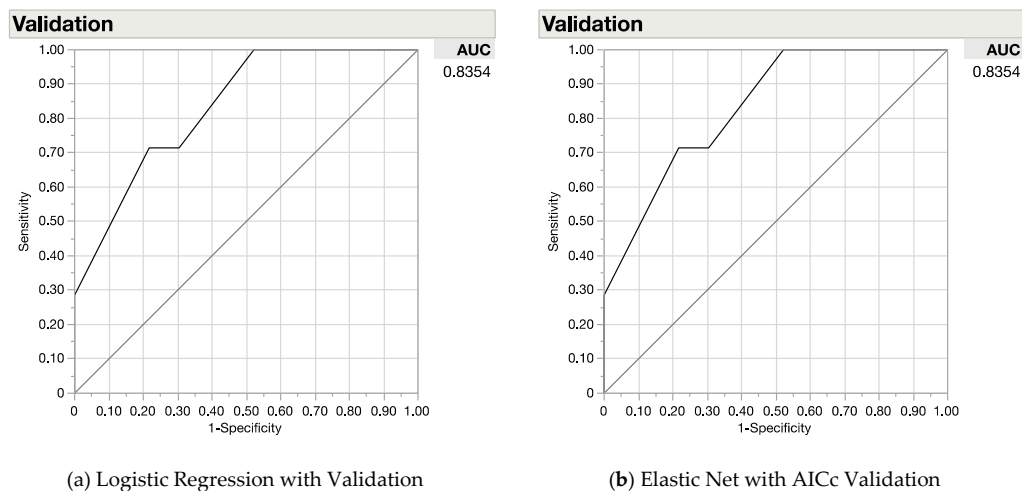

**Figure S2.** Predictors of Glycemic Index (55), including 1 HEI (total fruit), 1 Caloric (carbohydrate), and 1 Diet Factors (Mexican diet): Area under the receiver operating characteristic curve (AUC) for baseline (a) logistic regression model; (b) Elastic Net with Akaike's information criteria with correction (AICc) validation model.



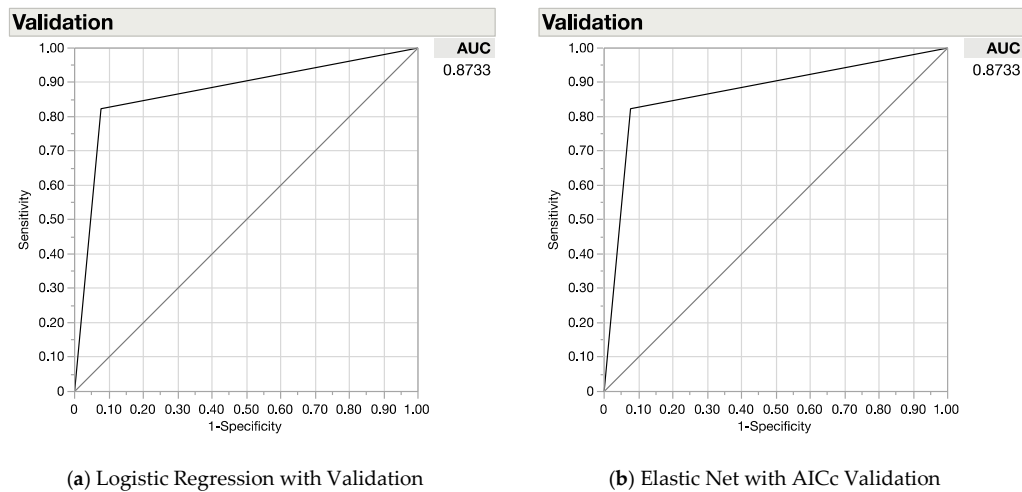

**Figure S3.** Predictors of Glycemic Load (71.8), Carbohydrate: Area under the receiver operating characteristic curve (AUC) for baseline (a) logistic regression model; (b) Elastic Net with Akaike's information criteria with correction (AICc) validation model.

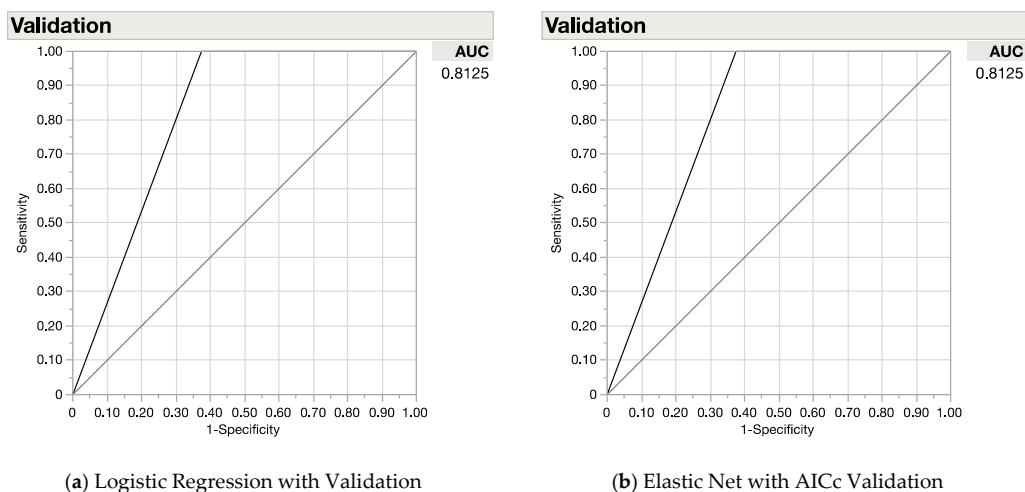

**Figure S4.** Predictors of standardized carbohydrates per number of meals needed for GL <20, ( $\leq 33.95$  g), including 3 Diet Factors (canned food, Mexican, and smoothie diets): Area under the receiver operating characteristic curve (AUC) for baseline (a) logistic regression model; (b) Elastic Net with Akaike's information criteria with correction (AICc) validation model.
